# Supplementary material for: Ex Vivo Cell Therapy by Ectopic Hepatocyte Transplantation Treats the Porcine Tyrosinemia Model of Acute Liver Failure
Source: PubMed Central journal article supplement — Mol Ther Methods Clin Dev. 2020 Jul 10;18:738–50. doi: 10.1016/j.omtm.2020.07.009 (PMC7452193; doi:10.1016/j.omtm.2020.07.009), 2020-07-10
Supplement: mmc1.pdf [file mmc1.pdf]

## **Supplemental Information**

### ***Ex Vivo* Cell Therapy by Ectopic Hepatocyte**

### **Transplantation Treats the Porcine Tyrosinemia**

### **Model of Acute Liver Failure**

**Clara T. Nicolas, Robert A. Kaiser, Raymond D. Hickey, Kari L. Allen, Zeji Du, Caitlin J. VanLith, Rebekah M. Guthman, Bruce Amiot, Lukkana Suksanpaisan, Bing Han, Maria Giovanna Francipane, Amin Cheikhi, Huailei Jiang, Aditya Bansal, Mukesh K. Pandey, Ishan Garg, Val Lowe, Aditya Bhagwate, Daniel O'Brien, Jean-Pierre A. Kocher, Timothy R. DeGrado, Scott L. Nyberg, Eric Lagasse, and Joseph B. Lillegard**

## Supplementary Materials

**Supplementary Table 1.** Summary of cell transplantations.

| Pig ID | Sex    | Weight at Transplant (kg) | Live Cells Harvested ( $\times 10^6$ ) | Viability (%) | Injection Volume of Saline (mL) | Number of Lymph Nodes Injected | Cells Transplanted ( $\times 10^6$ ) | Cells Transplanted ( $\times 10^6/\text{kg}$ ) | Days of Follow-up |
|--------|--------|---------------------------|----------------------------------------|---------------|---------------------------------|--------------------------------|--------------------------------------|------------------------------------------------|-------------------|
| 265    | Female | 20.8                      | 1160                                   | 84            | 10                              | 10-20                          | 600                                  | 28.8                                           | 239               |
| 268    | Male   | 19.8                      | 770                                    | 77            | 20                              | 10-20                          | 600                                  | 30.3                                           | 235               |
| 270    | Male   | 16.4                      | 995                                    | 82            | 20                              | 10-20                          | 600                                  | 36.6                                           | 241               |
| 272    | Male   | 19.0                      | 975                                    | 74            | 20                              | 10-20                          | 600                                  | 31.6                                           | 212               |
| 278    | Female | 19.6                      | 671                                    | 85            | 20                              | 10-20                          | 600                                  | 30.6                                           | 239               |

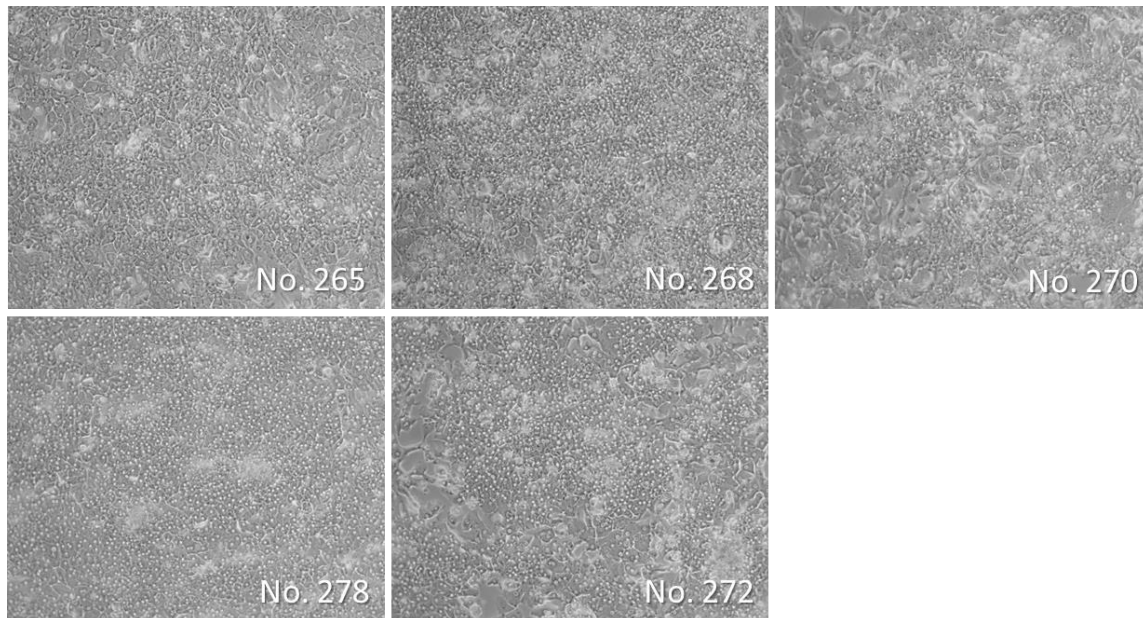

**Supplementary Figure 1. Isolated hepatocytes for autotransplantation were platable in culture.** Representative hepatocytes from all pigs (Nos. 265, 268, 270, 278, and 272) were cultured for a full 48 hours after isolation to evaluate platability, which was qualitatively evaluated as a surrogate indicator for predicting engraftment *in vivo*.

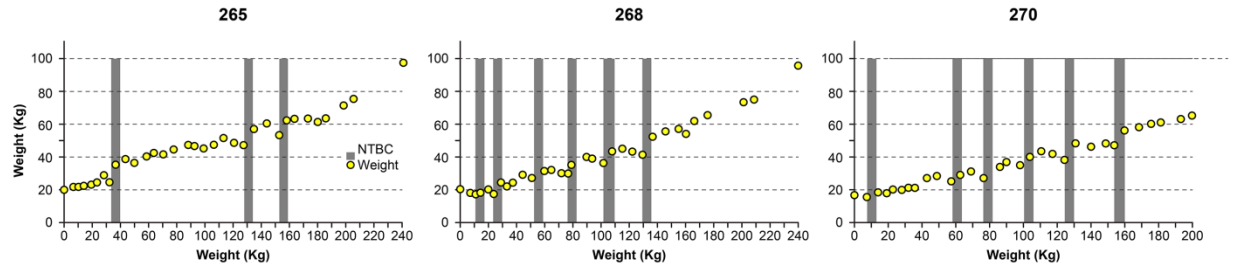

**Supplementary Figure 2. Weight stabilization of pigs 265, 268, and 270.** NTBC-independent weight gain was achieved at days 158, 133, and 163, respectively, after three to six cycles on the drug (represented by gray vertical bars).

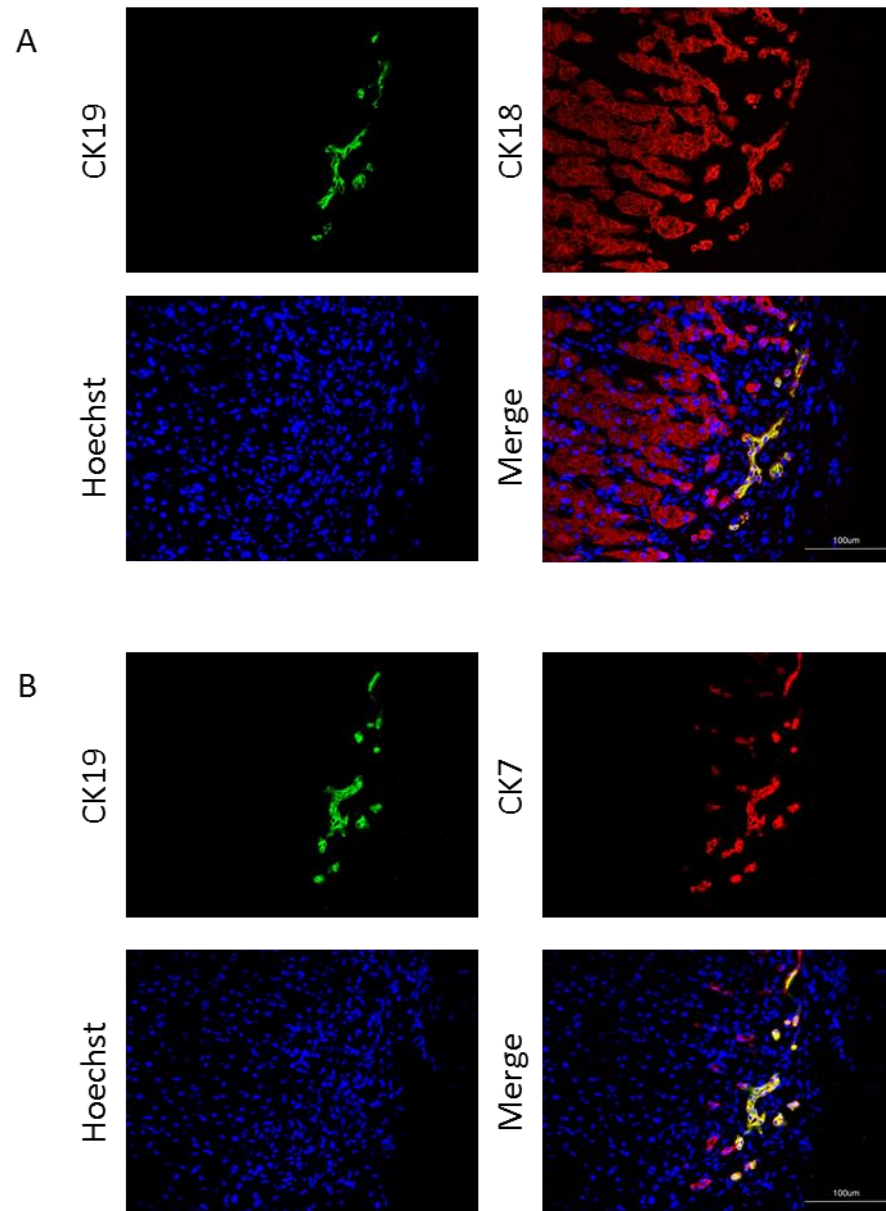

**Supplementary Figure 3. Regions of hepatocyte engraftment in lymph nodes develop bile duct cells.** Bile duct cell presence was further explored in Pig No. 265. A) At the periphery of nodules of hepatocyte engraftment and expansion, rare sections also contain cells that express CK19 (green), a common marker for bile duct cells. CK18 (red) and Hoechst staining demonstrate the presence of the hepatocytes in this section, verifying that it is a site of engraftment. B) All CK19-positive cells (green) were also positive for CK7 (red), although the

merged panel indicates that only the majority of CK7 positive cells were also positive for CK19 (co-localization in yellow).

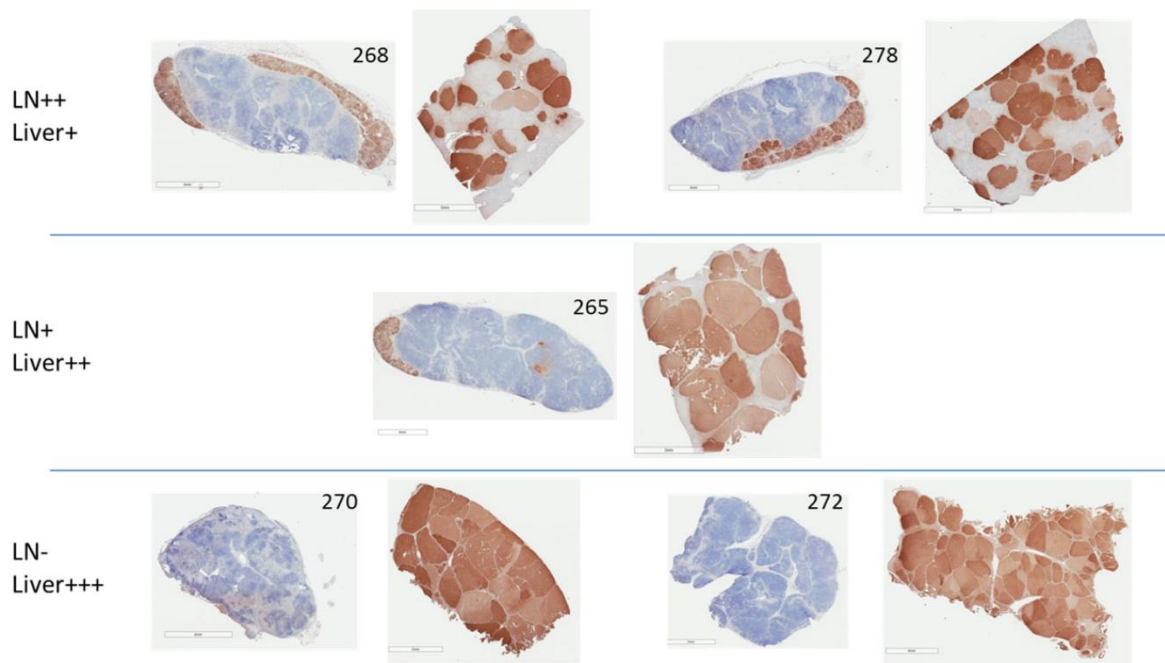

**Supplementary Figure 4. Correlation between presence of FAH-positive hepatocytes in lymph node and liver.** Animals with partial liver repopulation with FAH-positive hepatocytes (pigs 268 and 278) still had robust ectopic liver tissue presence in lymph nodes at the time of euthanization. Animals with complete liver repopulation with FAH-positive hepatocytes (pigs 270 and 272) had little to no presence of ectopic liver tissue in lymph nodes at the time of euthanization.

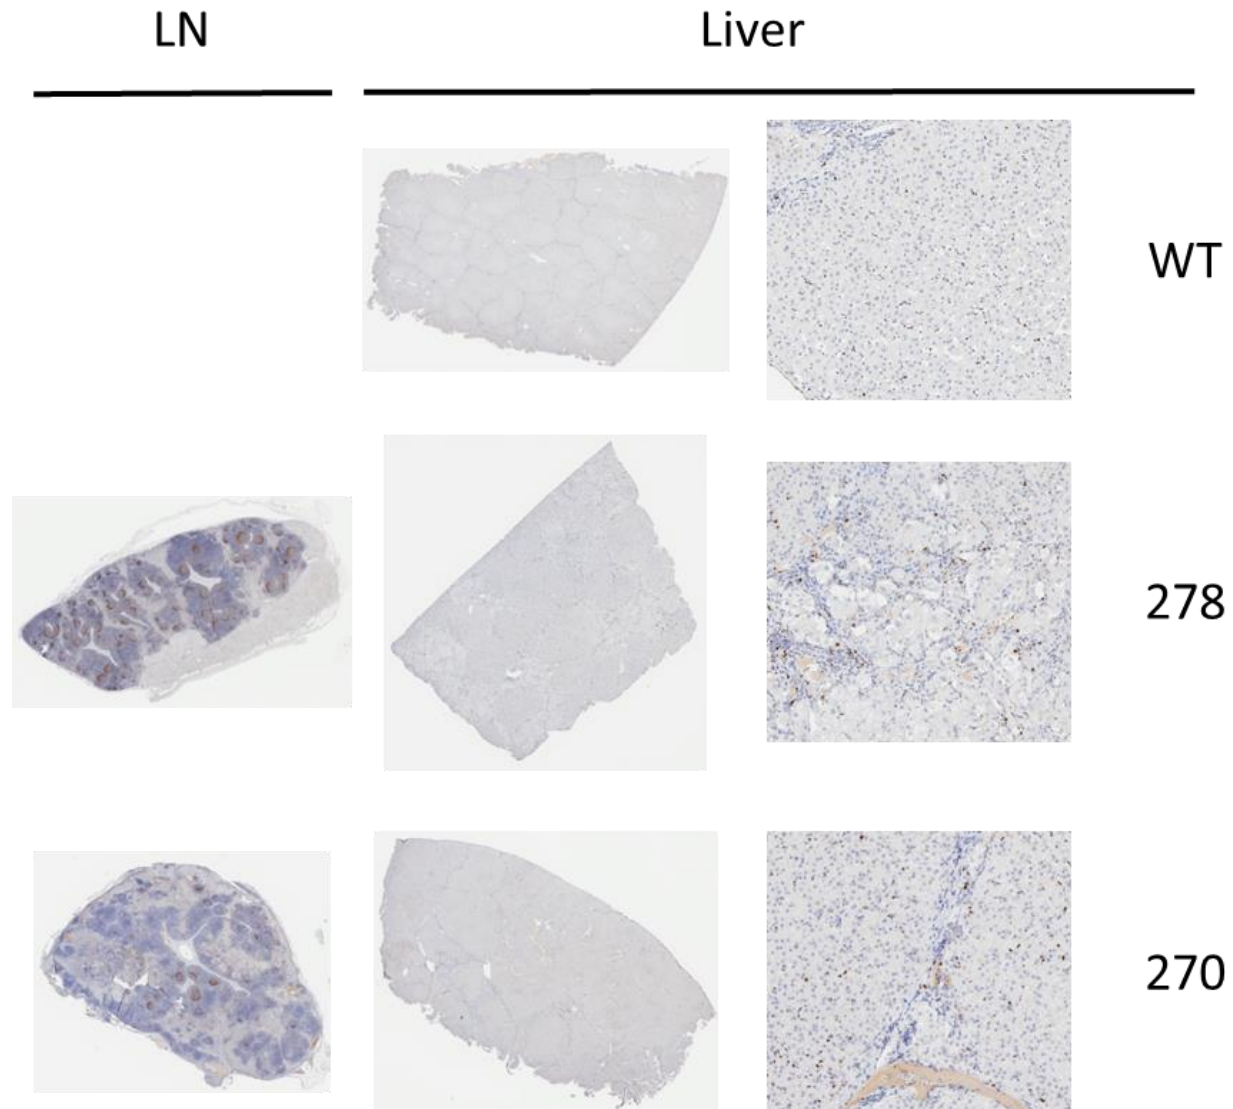

**Supplementary Figure 5. Eight months after transplantation, hepatocytes in lymph nodes and livers are not actively proliferating.** At termination (approximately 8 months post-transplantation) animals with partial liver repopulation with FAH-positive hepatocytes (such as pig 268) and those with complete liver repopulation with FAH-positive hepatocytes (such as pig 270) showed unremarkable Ki-67 positivity relative to wild type pig liver (top row), indicating that proliferation in both tissues was largely complete at the time of termination.

**Supplementary Table 2.** Next generation sequencing mapping statistics

| Sample     | Total Reads | Mapped Reads (Total) | Integration Points<br>at 1X | Integration Points<br>at 5X |
|------------|-------------|----------------------|-----------------------------|-----------------------------|
| Lymph node | 115.748.080 | 5,465,009 (7.34 %)   | 40.239                      | 6.335                       |
| Liver      | 116.490.845 | 21,126,444 (22.29 %) | 27.987                      | 4.270                       |

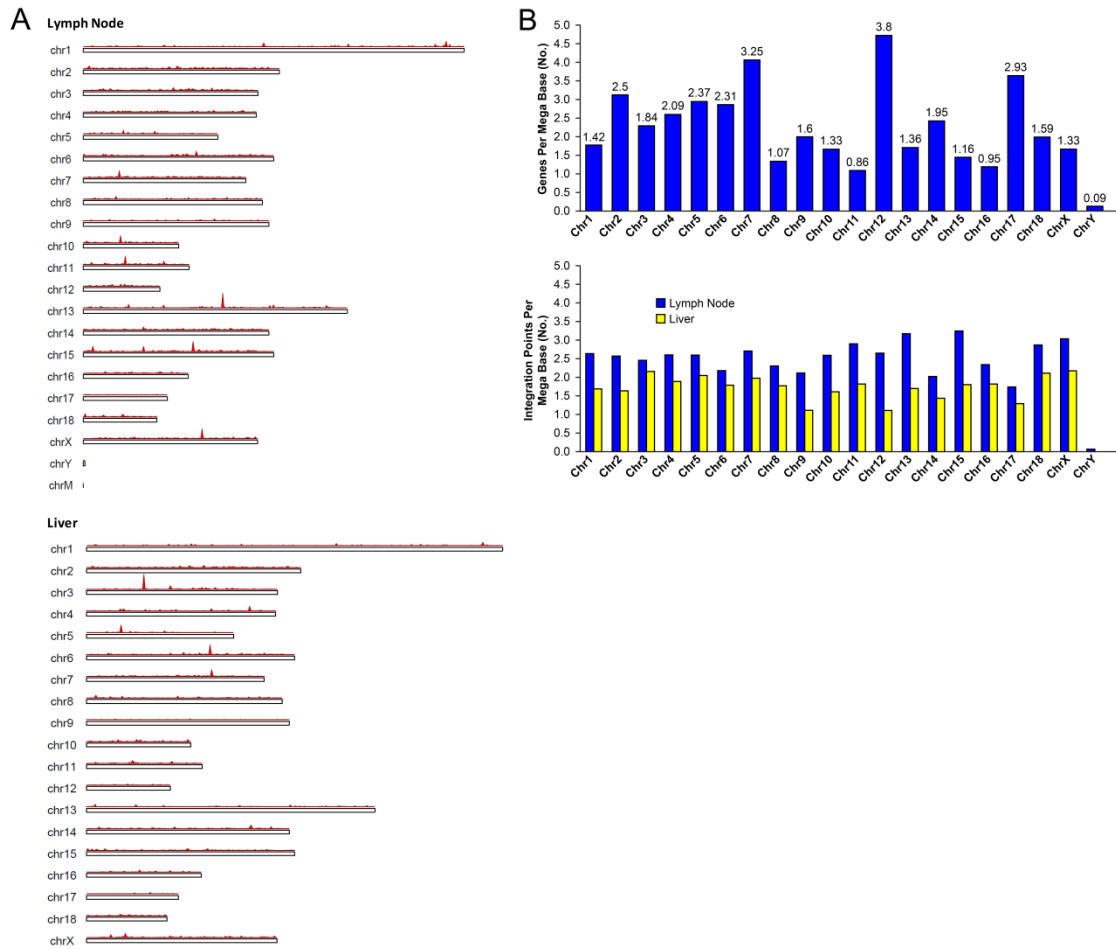

**Supplementary Figure 6. Lentiviral integration profile in lymph node vs. liver hepatocytes.**

(A) Chromosomal integration map for transplanted hepatocytes that remained in lymph nodes (top) and transplanted hepatocytes that migrated to the liver (bottom). Red vertical bars represent integration points. (B) Relative gene density per chromosome (top) compared to relative integration density per chromosome (bottom).

**Supplementary Table 3. Liver-specific genes included in RNA sequencing analysis**

| LIGEP                           |          |                                                                |
|---------------------------------|----------|----------------------------------------------------------------|
| ENSSSCG00000011799              | AHSG     | Alpha 2-HS glycoprotein                                        |
| ENSSSCG00000008948              | ALB      | Albumin                                                        |
| ENSSSCG00000004597              | AQP9     | Aquaporin 9                                                    |
| ENSSSCG00000015661              | C4BPB    | C4b-binding protein beta chain                                 |
| ENSSSCG00000009413              | CPB2     | Carboxypeptidase B2                                            |
| ENSSSCG00000013252              | F2       | Coagulation factor II (thrombin)                               |
| ENSSSCG00000008997              | FGB      | Fibrinogen beta chain                                          |
| ENSSSCG00000006702              | FMO5     | Flavin containing monooxygenase 5                              |
| ENSSSCG00000010639              | HABP2    | Hyaluronan binding protein 2                                   |
| ENSSSCG00000002749              | HPR      | Haptoglobin                                                    |
| ENSSSCG00000014626              | HPX      | Hemopexin                                                      |
| ENSSSCG00000015616              | HSD11B1  | Hydroxysteroid (11-beta) dehydrogenase 1                       |
| ENSSSCG00000009225              | HDD17B13 | Hydroxysteroid (17-beta) dehydrogenase 13                      |
| ENSSSCG00000011450              | ITIH1    | Inter-alpha-trypsin inhibitor heavy chain H1                   |
| ENSSSCG00000011451              | ITIH3    | Inter-alpha-trypsin inhibitor heavy chain H3                   |
| ENSSSCG00000011453              | ITIH4    | Inter-alpha-trypsin inhibitor heavy chain H4                   |
| ENSSSCG00000015799              | KLKB1    | Plasma kallikrein                                              |
| ENSSSCG00000015332              | PON1     | Paraoxonase 1                                                  |
| ENSSSCG00000023693              | PROC     | Vitamin K-dependent protein C                                  |
| ENSSSCG00000000419              | RDH16    | Retinol dehydrogenase 16                                       |
| ENSSSCG00000015493              | SERPINC1 | Antithrombin-III                                               |
| ENSSSCG00000010093              | SERPIND1 | Heparin cofactor 2                                             |
| ENSSSCG00000002515              | SLC25A47 | Solute carrier family 25 member 47                             |
| ENSSSCG000000027801             | VTN      | Vitronectin                                                    |
| Additional Liver-Specific Genes |          |                                                                |
| ENSSSCG00000016199              | CYP27A1  | Cytochrome P450 family 27 subfamily A member 1                 |
| ENSSSCG00000022092              | CYP7B1   | Cytochrome P450 family 7 subfamily B member 1                  |
| ENSSSCG00000001780              | FAH      | Fumarylacetoacetate hydrolase                                  |
| ENSSSCG00000012236              | OTC      | Ornithine transcarbamylase                                     |
| ENSSSCG00000000856              | PAH      | Phenylalanine hydroxylase                                      |
| ENSSSCG00000002009              | PCK2     | Phosphoenolpyruvate carboxykinase 2                            |
| ENSSSCG00000002476              | SERPINA1 | Alpha-1-antitrypsin                                            |
| ENSSSCG00000002736              | TAT      | Tyrosine aminotransferase                                      |
| ENSSSCG00000008949              | AFP      | Alpha-fetoprotein                                              |
| ENSSSCG00000024520              | ABCB4    | Adenosine triphosphate-binding cassette, subfamily B, member 4 |
| ENSSSCG00000015926              | ABCB11   | Adenosine triphosphate-binding cassette B11                    |
| ENSSSCG00000009919              | HNF1A    | Hepatocyte nuclear factor 1 homeobox A                         |
| ENSSSCG000000022417             | HNF1B    | Hepatocyte nuclear factor-1-beta                               |
| ENSSSCG00000007371              | HNF4A    | Hepatocyte nuclear factor 4 alpha                              |
| ENSSSCG00000000875              | NR1H4    | Nuclear receptor subfamily 1 group H member 4                  |
| ENSSSCG00000011890              | NR1I2    | Nuclear receptor subfamily 1 group I member 2                  |
| ENSSSCG00000006353              | NR1I3    | Nuclear receptor subfamily 1 group I member 3                  |
| ENSSSCG00000024926              | ASGR1    | Asialoglycoprotein receptor 1                                  |
| ENSSSCG00000008326              | TGFA     | Transforming growth factor alpha                               |
| ENSSSCG00000001695              | VEGFA    | Vascular endothelial growth factor A                           |

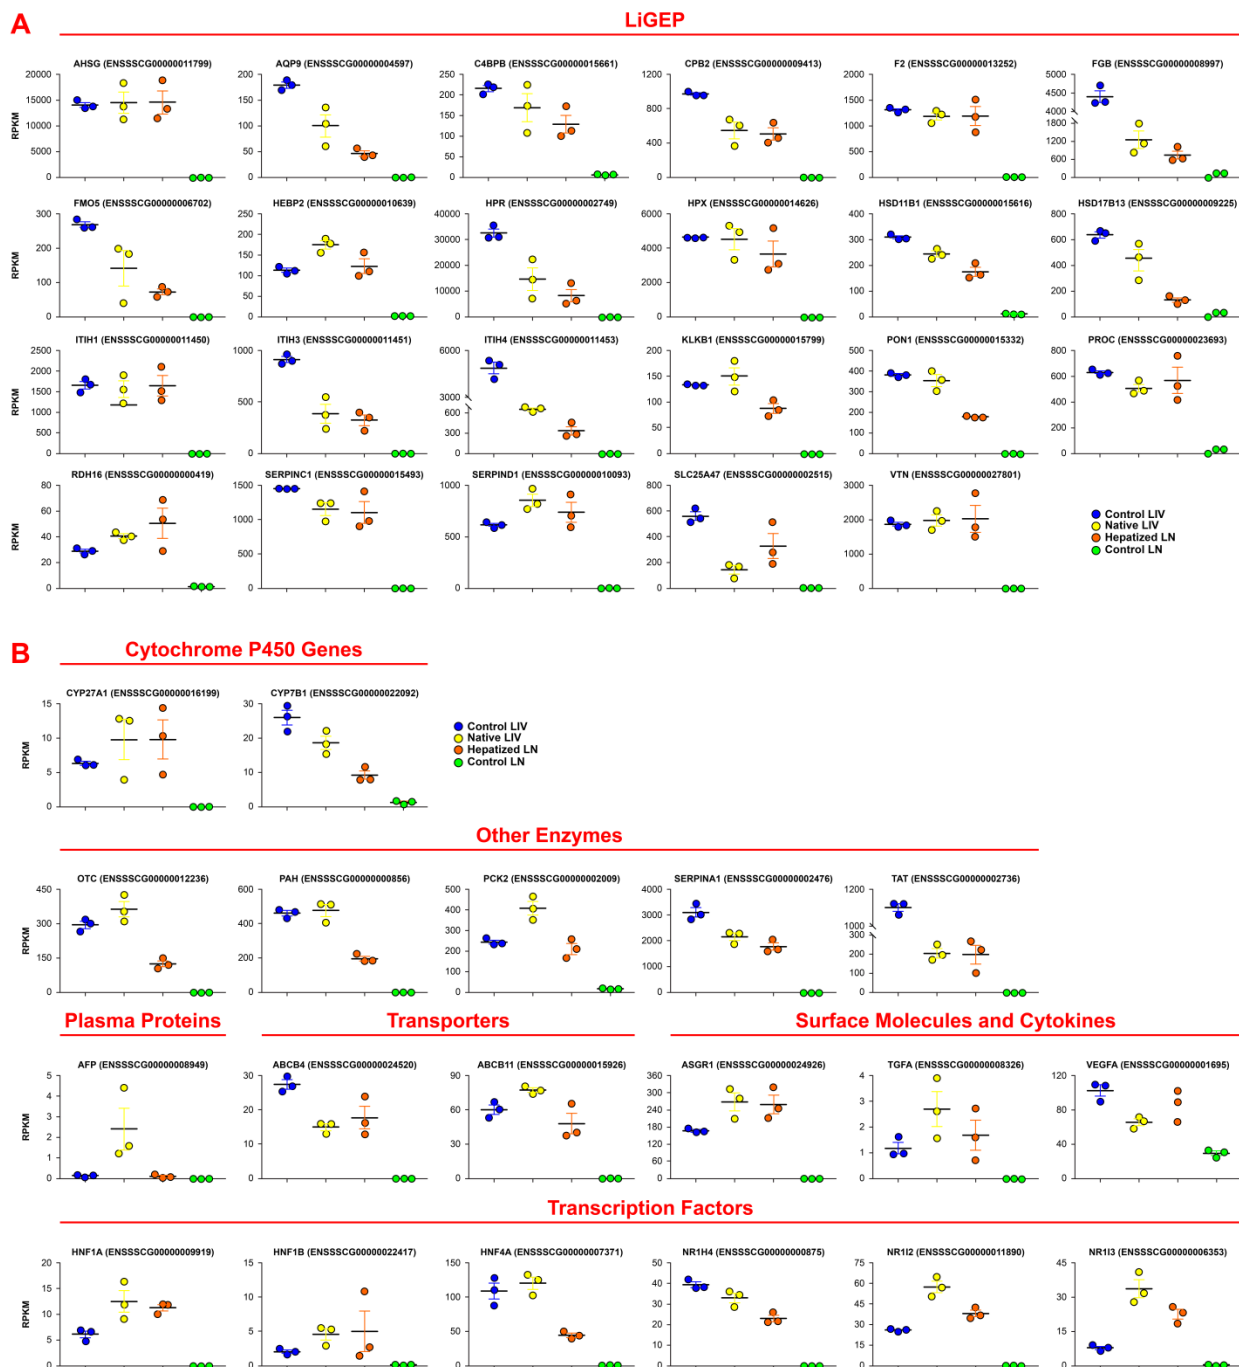

**Supplementary Figure 7. Further RNA sequencing analysis.** Scatter dot plot graphs showing RPKM values for LiGEP (liver-specific gene expression panel) (A) or additional liver-specific genes (B) in control liver, native liver, hepatized lymph node, and control lymph node. Data are mean  $\pm$  SEM.

**Supplementary Video 1. 3D render movie of PET-CT images of  $^{89}\text{Zr}$ -labeled hepatocytes at 6 h post-transplantation into mesenteric lymph nodes in pig.**

**Supplementary Video 2. 3D render movie of PET-CT images of NIS-labeled hepatocytes at 3 months post-transplantation into mesenteric lymph nodes in pig 265.**

**Supplementary Video 3. 3D render movie of PET-CT images of NIS-labeled hepatocytes at 6 months post-transplantation into mesenteric lymph nodes in pig 265.**

**Supplementary Video 4. 3D render movie of PET-CT images of NIS-labeled hepatocytes at 5 months post-transplantation into mesenteric lymph nodes in pig 268.**

**Supplementary Video 5. 3D render movie of PET-CT images of NIS-labeled hepatocytes at 6 months post-transplantation into mesenteric lymph nodes in pig 268.**
